# Supplementary figures and images for: Cellular and molecular dynamics in the lungs of neonatal and juvenile mice in response to E. coli
Source: eLife journal article supplement (doi:10.7554/elife.82933), 2023-06-02

**Figure 1- figure supplement 1.**


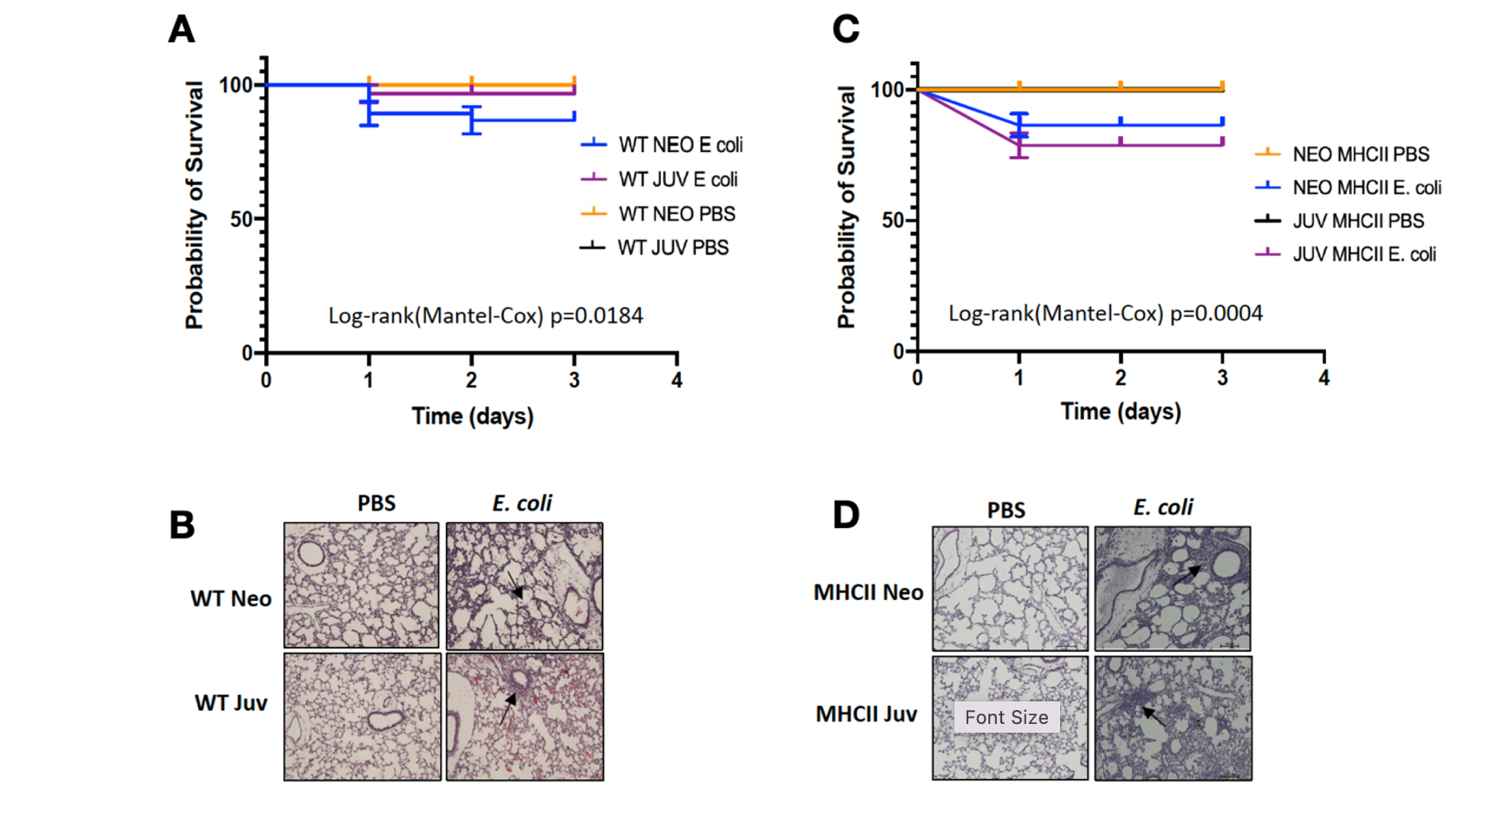

Supplement: supp [file elife_poa_e82933_Figure_1_figure_supplement_1.docx]

**Figure 1-supplement figure 2**


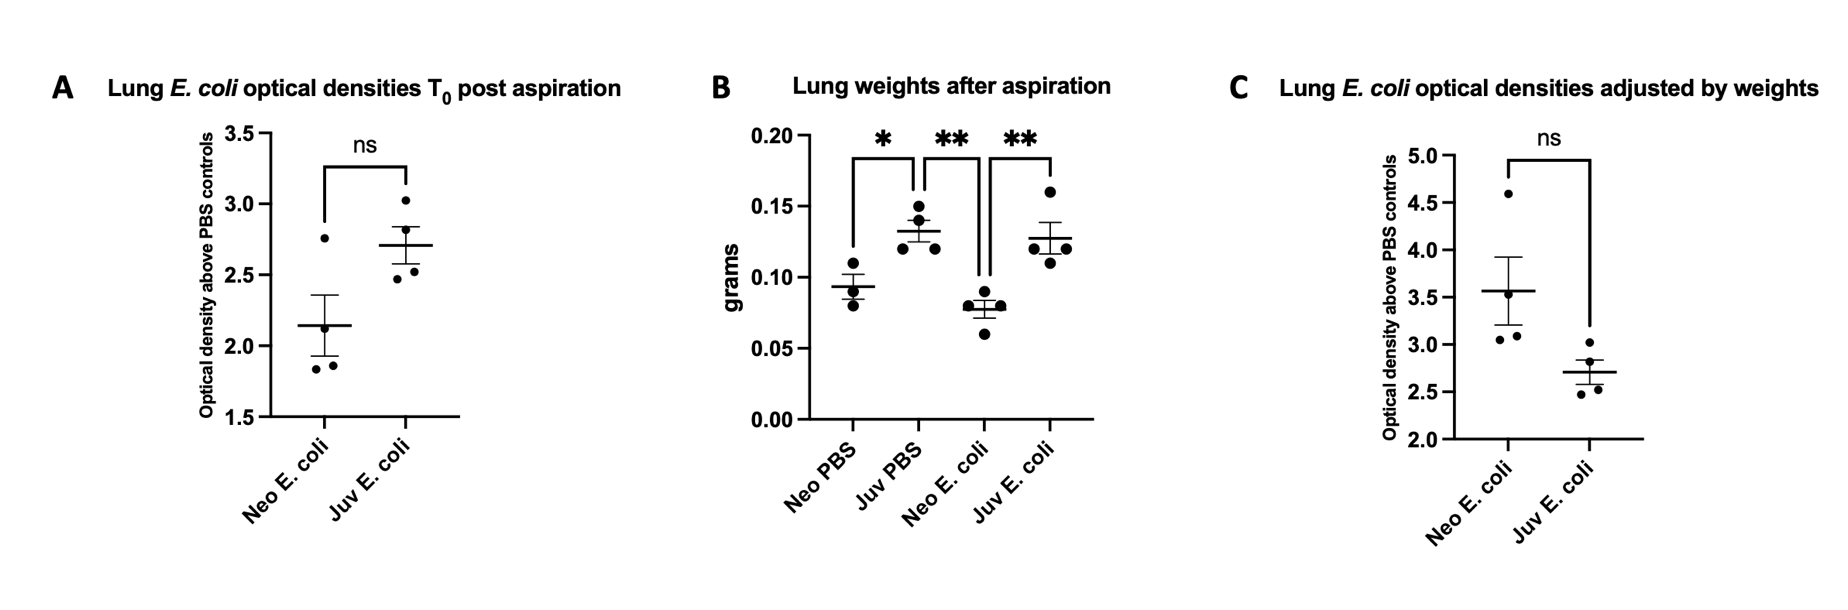

Supplement: supp [file elife_poa_e82933_Figure_1_figure_supplement_2.docx]

**Figure 2-figure supplement 1**

**
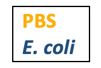
**
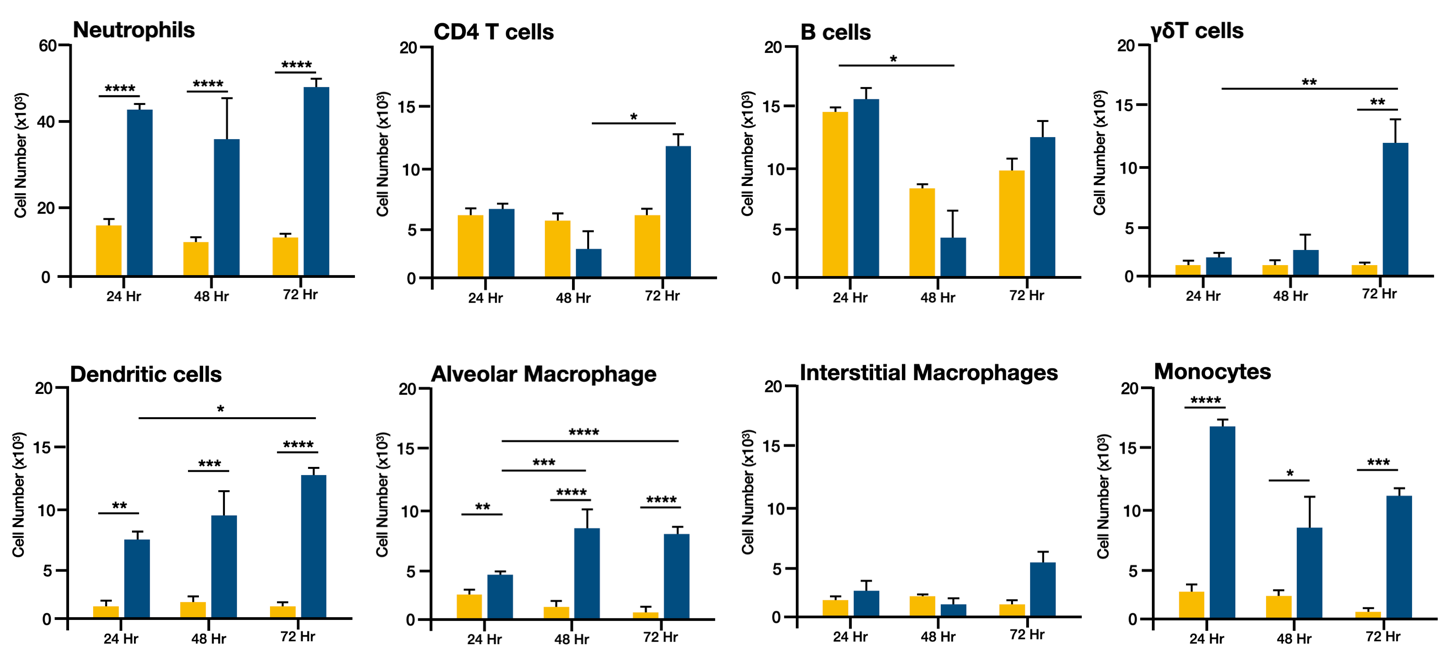

Supplement: supp [file elife_poa_e82933_Figure_2_figure_supplement_1.docx]

**Figure 3- figure supplement 1**


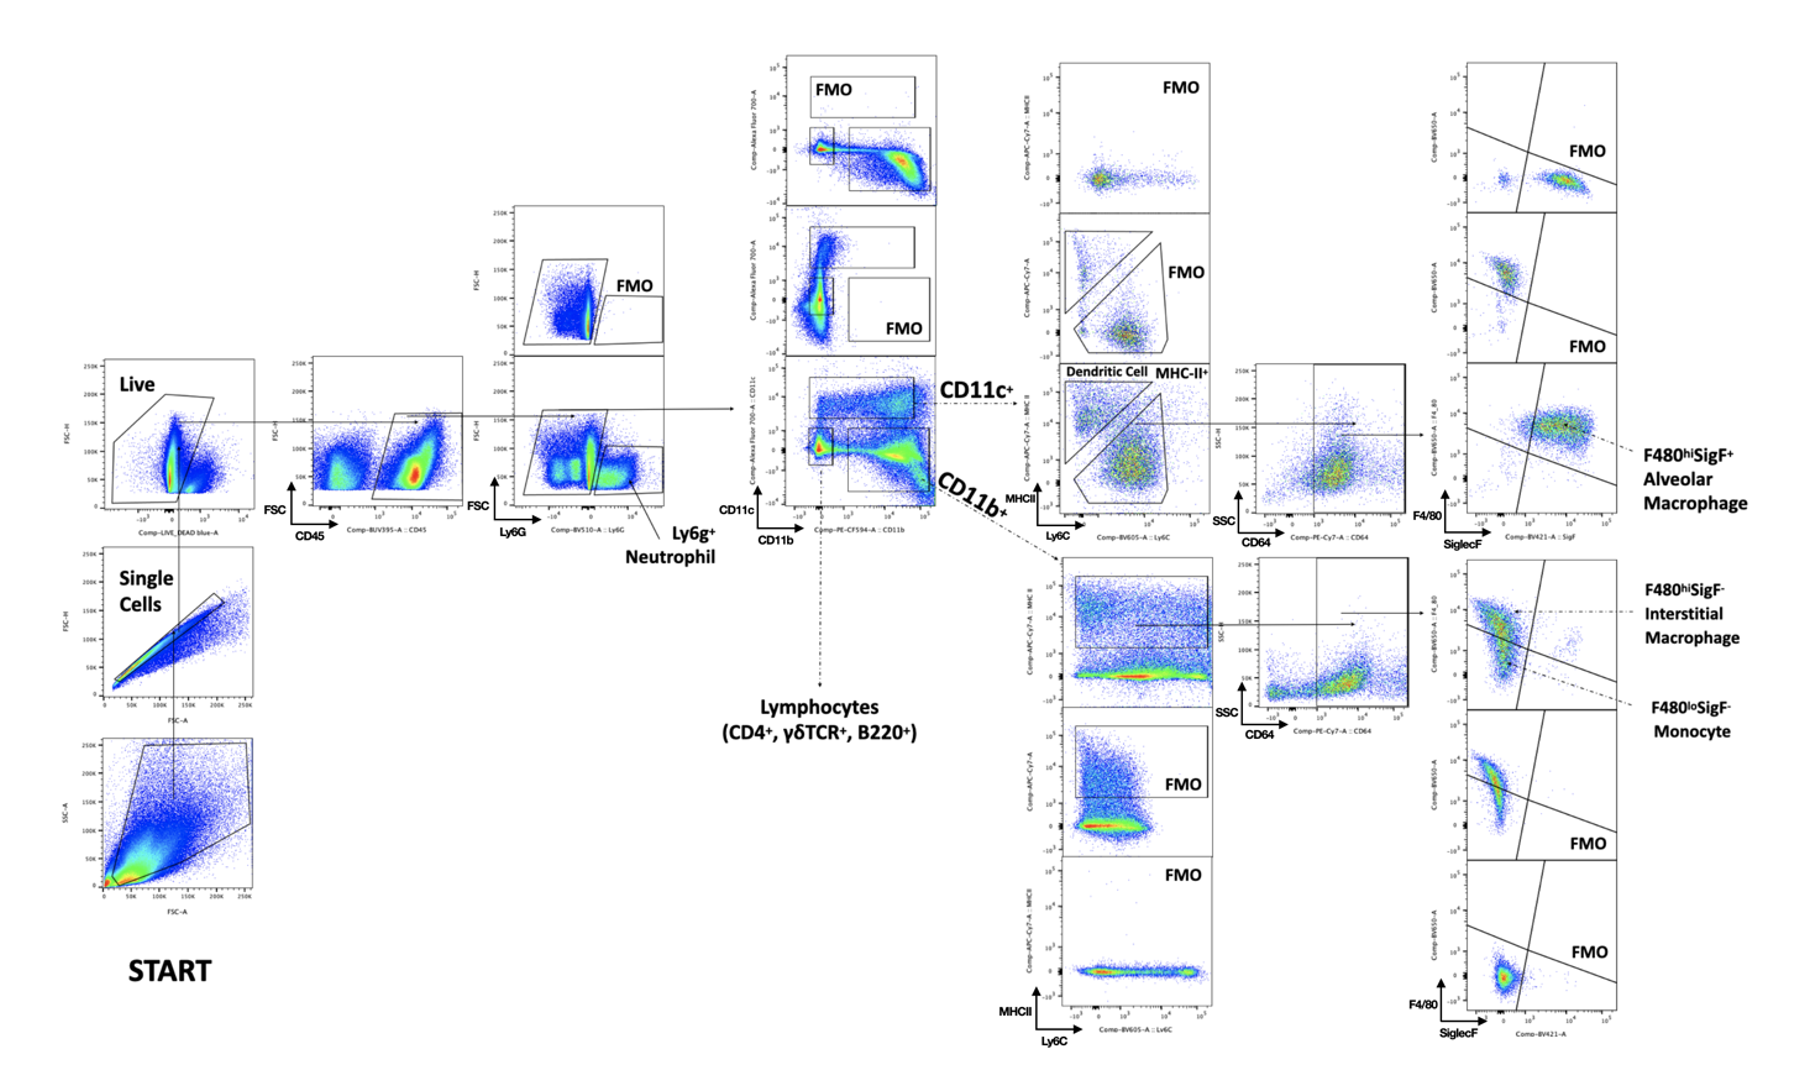

Supplement: supp [file elife_poa_e82933_Figure_3_figure_supplement_1.docx]
